# Supplementary figures and images for: A Novel Water-Soluble Polysaccharide from Daylily (Hemerocallis citrina Baroni): Isolation, Structure Analysis, and Probiotics Adhesion Promotion Effect
Source: MDPI journal article supplement (doi:10.3390/foods13050721), 2024-02-27

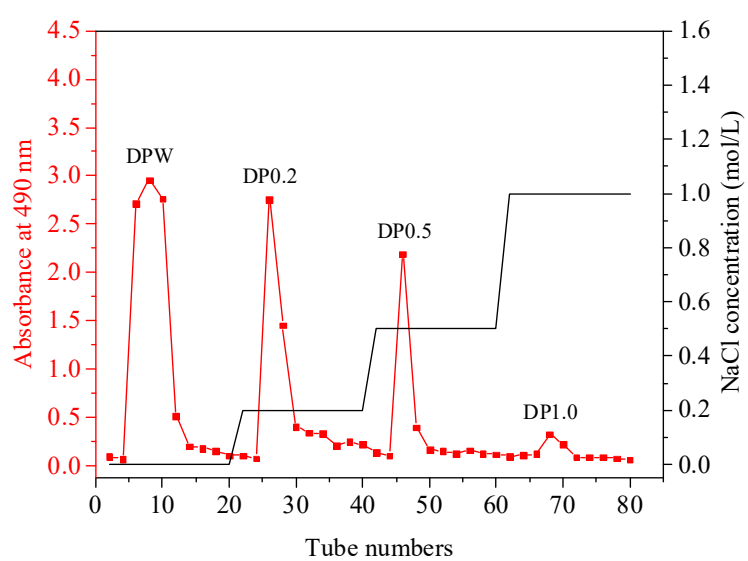

Figure S1 Chromatography of eluted DPs on DEAE Sepharose Fast Flow Column

Supplement: s1 [file s1]
